# Supplementary material for: Simulating the effect of subsurface drainage on the thermal regime and ground ice in blocky terrain, Norway
Source: Copernicus journal article supplement (doi:10.5194/esurf-2022-39), 2022-07-08
Supplement: Supplementary file 1 [file esurf-2022-39-supplement.pdf]

# Supplement 1 to “Simulating the effect of subsurface drainage on the thermal regime and ground ice in blocky terrain, Norway”

## 1 Simulated subsurface drainage rates

Here, we provide simulated subsurface drainage rates for two model scenarios at Juvvasshøe in addition to air temperature and  
5 rainfall at the site.

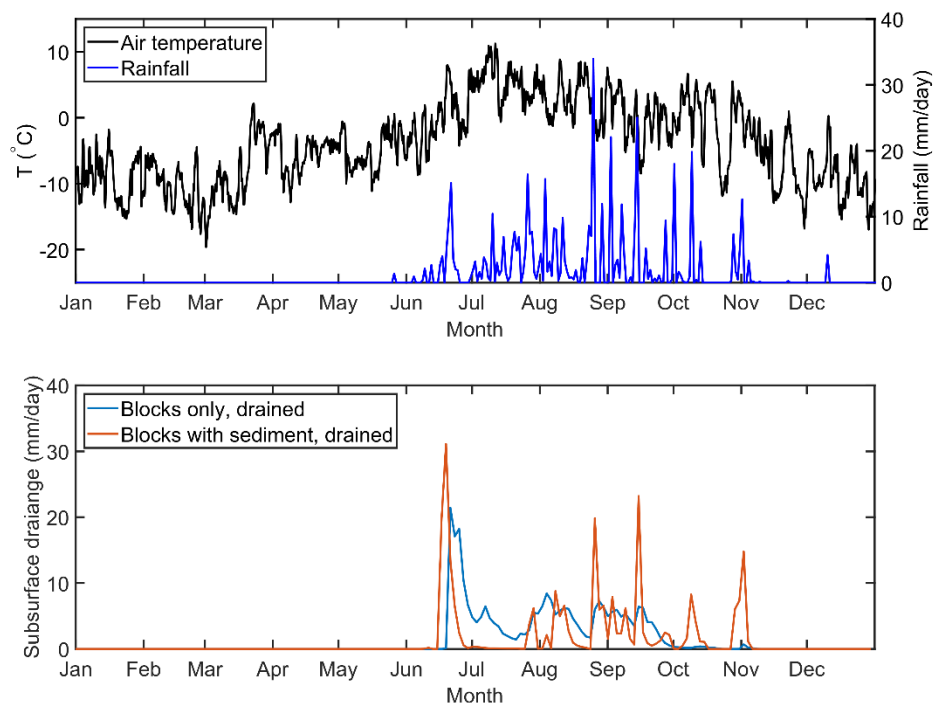

**Suppl. 1, Fig. 1:** Air temperature and rainfall (top) and lateral subsurface drainage out of the model realization for the *blocks only* and *blocks with sediment* stratigraphies (see Table 1), both *drained* (bottom) during a year of an equilibrium run at Juvvasshøe.  $S_f = 0.25$ . The drainage rate is the summed drainage over all grid cells.
